# Supplementary material for: Genome-Wide Identification and Expression Analysis of VviYABs Family Reveal Its Potential Functions in the Developmental Switch and Stresses Response During Grapevine Development
Source: Front Genet. 2022 Feb 3;12:762221. doi: 10.3389/fgene.2021.762221 (PMC8851417; doi:10.3389/fgene.2021.762221)
Supplement: Supplementary file 1 [file DataSheet2.xls]

## Sheet: Table S1
Table S1. The primers sequences of VviYABs for qRT-PCR.
Gene name	Gene ID	Forward primer sequences (5'-3')	Reverse primer sequences (5'-3')	Function
VviYAB1	VIT_15s0048g00550.t01	GACTGCTTCTTCCTGCTGCT	CGTTGGATCTCGTCCTTGAT	qRT-PCR
VviYAB2	VIT_08s0032g01110.t01	ATGTGCACTGCAACTTCTGC	AAGATCCGCACTCCTTGCTA	qRT-PCR
VviYAB3	VIT_02s0154g00070.t01	GATGTGGACACTGCACCAAC	AAAAGTCATTTGCGGTGGTC	qRT-PCR
VviFAS	VIT_06s0009g00880.t01	CAGAGCATGAACAGCCAAGA	GCAAATGCCTGATCCAACTT	qRT-PCR
VviActin	AB073011	TCACCACTACTGCTGAACGG	ATTCCTGCAGCTTCCATCCC	qRT-PCR
VviCRC	VIT_01s0011g00140.t01	ACCAGTCTCTCTCTCAAGCTTATGGATTTGGTTCCACCATCT	GCTCACCATGGATCCAAGCTTTTCATTGTTACTGCTCTCAGA	Subcellular localization
VviFAS	VIT_06s0009g00880.t01	ACCAGTCTCTCTCTCAAGCTTATGTCACTGGACATCACCCCC	GCTCACCATGGATCCAAGCTTATAGAATCCATGAGCCTTGTG	Subcellular localization
VviYAB3	VIT_02s0154g00070.t01	ACCAGTCTCTCTCTCAAGCTTATGTCCTCCTCTTCAACCTTG	GCTCACCATGGATCCAAGCTTGTAAGGAGAGACACCGACATT	Subcellular localization
Restriction sites are indicated in red. The type of experiment for which the primers were used is indicated in brackets (qRT-PCR: quantitative reverse transcription PCR).

## Sheet: Table S2
Table S2. The synteny regions amony grapevine, Arabidopsis and tomato YABs.
Numble	Segment1	Chrom	Chr srart	Chr end	Segment2	Chrom	Chr srart	Chr end	Segment1	Segment2
1	VviFAS	chr6	11951344	11957729	SlFAS	SL11	55165970	55172156	5`- 10993012..12351566-3`	5`-54861778..55353197-3`
2	VviYAB3	chr2	4862199	4864424	SlYAB1	SL01	84714569	84718183	5`- 4421518..5261179-3`	5`-84616786..85159398-3`
3	VviYAB3	chr2	4862199	4864424	SlYAB3	SL08	62742783	62745941	5`- 4822703..5380976-3`	5`-62400520..62789877-3`
4	VviYAB1	chr15	14675136	14677631	SlYAB1	SL01	84714569	84718183	5`- 14411453..14769341-3`	5`-84676405..84897243-3`
5	VviYAB5	chr11	5014314	5017431	SlYAB5a	SL07	2916878	2921216	5`- 4870814..5017668-3`	5`-2782240..2921216-3`
6	VviCRC	chr1	237670	239297	SlCRCb	SL05	5275528	5277367	5`- 48574..779392-3`	5`-5158846..5837811-3`
7	VviYAB3	chr2	4862199	4864424	AtYAB1	AT2	18628265	18630712	5`- 4139671..5261179-3`	5`-18610806..18821889-3`
8	VviINO	chr1	7691531	7692677	AtINO	AT1	8317396	8319483	5`- 7494007..9962409-3`	5`-8295185..8570505-3`
9	VviCRC	chr1	237670	239297	AtCRC	AT1	26007465	26009059	5`- 32355..779392-3`	5`-25957819..26076254-3`
10	SlYAB5b	SL12	2837633	2843798	SlYAB5a	SL07	2916878	2921216	5`- 2815885..3056056-3`	5`-2067659..2979543-3`
11	SlFAS	SL11	55165970	55172156	SlYAB2	SL06	45648701	45654788	5`- 54966705..55200995-3`	5`-45472546..45723039-3`
12	SlCRCb	SL05	5275528	5277367	SlCRCa	SL01	5028897	5031428	5`- 4654381..5731897-3`	5`-4683610..5313481-3`
13	SlYAB2	SL06	45648701	45654788	AtYAB2	AT1	2675813	2679781	5`- 45621200..46646598-3`	5`-2477157..2685621-3`
14	SlCRCb	SL05	5275528	5277367	AtCRC	AT1	26007465	26009059	5`- 4302127..5495631-3`	5`-25793207..26040720-3`
15	SlYAB1	SL01	84714569	84718183	AtYAB3	AT4	72552	75384	5`- 84269539..84770344-3`	5`-14627..82040-3`
16	SlYAB1	SL01	84714569	84718183	AtYAB1	AT2	18628265	18630712	5`- 83126517..85150411-3`	5`-18382070..18744111-3`
17	AtYAB3	AT4	72552	75384	AtYAB1	AT2	18628265	18630712	5`- 57199..92237-3`	5`-18617862..18720729-3`

## Sheet: Table S3
Table S3. Promoter analysis of the grapevine VviYAB gene family.
Element	Function			Gene name
		VviYAB1	VviYAB2	VviYAB3	VviYAB5	VviFAS	VviINO	VviCRC
3-AF1 binding site	light responsive element			2	1	2
3-AF3 binding site	part of a conserved DNA module array (CMA3)				1
5UTR Py-rich stretch	cis-acting element conferring high transcription levels	4	4	3	4	17	2	1
AAGAA-motif				2	1	3	1	1
ABRE	cis-acting element involved in the abscisic acid responsiveness	4			1		2	1
AC-I				1			1
AC-II			1	1
ACE	cis-acting element involved in light responsiveness			1			2
AE-box	part of a module for light response			1	1		1	2
ARE	cis-acting regulatory element essential for the anaerobic induction	3	2	2	1	2		3
ATC-motif	part of a conserved DNA module involved in light responsiveness						1
ATCT-motif	part of a conserved DNA module involved in light responsiveness		1
ATGCAAAT motif	cis-acting regulatory element associated to the TGAGTCA motif		1
Box 4	part of a conserved DNA module involved in light responsiveness	2	2		1	2	1	2
Box I	light responsive element	1		3	1	2		1
Box III	protein binding site				1
Box-W1	fungal elicitor responsive element	3		1		1	1
CAAT-box	common cis-acting element in promoter and enhancer regions	27	25	23	27	30	28	26
CAT-box	cis-acting regulatory element related to meristem expression	2			2	1
CATT-motif	part of a light responsive element	1	2	2			1	3
CCAAT-box	MYBHv1 binding site	1
CGTCA-motif	cis-acting regulatory element involved in the MeJA-responsiveness	3	1	1				1
ELI-box3	elicitor-responsive element	1				1
EIRE	elicitor-responsive element							1
ERE	ethylene-responsive element			2		2		1
G-Box	cis-acting regulatory element involved in light responsiveness	2			1	1	2	1
G-box	cis-acting regulatory element involved in light responsiveness	4	1	2	1	2	4	4
GA-motif	part of a light responsive element	1				2	1	1
GAG-motif	part of a light responsive element	2		4	1	4	1
GARE-motif	gibberellin-responsive element		1	2		1		1
GATA-motif	part of a light responsive element	4			1	1
GC-motif	enhancer-like element involved in anoxic specific inducibility						1
Gap-box	part of a light responsive element						1
GCN4_motif	cis-regulatory element involved in endosperm expression	1	2	5
GT1-motif	light responsive element	4	1	1				1
HSE	cis-acting element involved in heat stress responsiveness				1	2
I-box	part of a light responsive element	4		2	1		1
LAMP-element	part of a light responsive element					1
L-box	part of a light responsive element			2
LTR	cis-acting element involved in low-temperature responsiveness			1
MBS	MYB binding site involved in drought-inducibility	1		1				2
MNF1	light responsive element	1
MRE	MYB binding site involved in light responsiveness							1
O2-site	cis-acting regulatory element involved in zein metabolism regulation	2						1
P-box	gibberellin-responsive element			1			1
Skn-1_motif	cis-acting regulatory element required for endosperm expression	6	2	7			1	4
Sp1	light responsive element		2	2	5	2	3	3
TATA-box	core promoter element around -30 of transcription start	42	17	35	79	83	36	44
TATC-box	cis-acting element involved in gibberellin-responsiveness			1			1
TATCCAT/C-motif						1	1
TC-rich repeats	cis-acting element involved in defense and stress responsiveness	3	3	1	2		2
TCA-element	cis-acting element involved in salicylic acid responsiveness			1	3	1	1	3
TCCACCT-motif		1				1
TCCC-motif	part of a light responsive element		1		1
TCT-motif	part of a light responsive element		1	2		1	1
TGA-element	auxin-responsive element	1
TGACG-motif	cis-acting regulatory element involved in the MeJA-responsiveness	3	1	1				1
Unnamed__1		2					1	1
Unnamed__2		1				1	1
Unnamed__3		2					1	1
Unnamed__4		15	4	24	21	6	20	12
Unnamed__5		1
Unnamed__13						2		2
Unnamed__16		1
W box		3		1		1	1
chs-CMA1a	part of a light responsive element	1			1
circadian	cis-acting regulatory element involved in circadian control	1	2	3		3	1	4

## Sheet: Table S4
Table S4. Expression profiles of the grapevine VviYABs in different organs, tissues and developmental stages.
Sample_title	BerryPericarp-FS	BerryPericarp-PFS	BerryPericarp-V	BerryPericarp-MR	BerryPericarp-R	BerryFlesh-PFS	BerryFlesh-V	BerryFlesh-MR	BerryFlesh-R	BerrySkin-PFS	BerrySkin-V	BerrySkin-MR	BerrySkin-R	Inflorescence-Y	Inflorescence-WD	Flower-FB	Flower-F	Stamen	Carpel	Petal	Pollen	Root	Leaf-Y	Leaf-FS	Leaf-S	Bud-S	Bud-B	Bud-AB	Bud-L	Bud-W	Rachis-FS	Rachis-PFS	Rachis-V	Rachis-MR	Rachis-R	Seed-V	Seed-MR	Seed-FS	Seed-PFS	Seedling	Stem-G	Stem-W	Tendril-Y	Tendril-WD	Tendril-FS
VviYAB1	13098	7671.11	2515.9	1345.96	1366.1	918.999	180.31	153.729	464.048	20049.5	4173.13	2491.15	2112.33	20205.7	17480.4	17262.7	14921.6	7178.71	13588	18620.5	2979.44	180.723	16495.3	5333.98	2171.13	10615.6	25924.3	21308.4	3604.27	3266.27	839.252	798.107	260.014	421.96	272.714	1764.76	1122.25	801.243	147.297	14246.8	1156.95	167.311	430.071	381.451	369.204
VviYAB2	8477.24	8858.5	5243.73	2409.3	2587.24	9111.26	3966.63	2096.61	1558.45	12571.1	4538.99	2792.73	5671.33	9256.12	8862.94	9381.21	9914.96	4264.58	11636.5	11820.2	2374.61	43.3478	10460.5	4032.63	1908.93	3224.35	6814.97	4919.95	2310.05	944.189	1857.78	1856.15	739.708	1712.28	1604.12	165.464	120.106	649.522	103.752	6840.6	589.522	156.194	2258.15	998.838	301.206
VviYAB3	6855.55	5047.86	1391.82	1980.5	818.479	4291.32	204.101	194.752	356.279	8585.88	1787.52	1112.09	1518.85	12253.4	9842.69	4385.16	5086.43	3880.11	8504.7	9990	2405.91	332.333	7240.57	3372.74	2107.98	24219.7	22433.4	14804.2	16464.5	5963.65	727.506	868.889	261.323	422.789	301.677	1418.14	954.213	886.854	397.724	13260.8	1197.41	674.241	1058.08	644.091	1010.96
VviYAB5	116.08	156.115	113.392	377.814	286.559	62.985	97.2917	74.3158	120.088	178.945	103.477	77.3092	202.83	1584.77	3603.72	6527.65	5149.59	1027.21	3459.2	1702.62	1173.85	79.1467	5109.56	2031.46	1313.89	1624.06	6197.45	3610.39	384.347	693.101	100.204	61.4383	84.8942	68.5917	61.7658	112.809	131.319	95.2942	118.683	3363.61	133.572	264.161	117.587	108.335	174.836
VviFAS	3867.62	1668.55	1992.56	1791.07	1360.69	4135.67	2556.51	2171.88	2160.75	3311.28	2095.43	1258.8	1090.98	1407.4	2498.66	1522.55	2500.34	621.826	2255.61	3405.23	440.436	35.0833	1357.88	994.278	513.37	737.42	2170.35	1190.59	584.047	137.086	255.727	258.233	253.664	269.572	244.077	108.338	117.3	264.702	80.1989	1585.37	276.849	118.301	523.62	331.804	130.073
VviINO	56.1525	103.551	96.1008	225.584	103.256	59.64	75.8483	72.03	95.2242	78.5758	86.7175	121.394	87.3617	82.0592	90.3533	65.015	80.6025	58.0517	93.4267	53.2142	69.5783	59.7325	152.109	126.855	118.915	72.7392	55.9392	604.708	49.1275	109.947	162.006	47.0233	58.6292	46.3275	41.54	65.3733	60.2983	243.823	56.8708	150.28	78.5342	101.437	73.7675	73.4433	81.06
VviCRC	92.0878	389.863	199.424	1200.98	486.112	120.782	87.0044	104.652	323.757	209.012	163.56	84.4	376.86	2562.16	10062.5	5179.44	3581.18	402.661	11214.9	889.986	140.128	115.292	428.211	248.182	580.309	62.3067	60.0644	540.473	81.0867	433.77	164.198	70.0044	71.2633	81.1878	68.7022	129.349	101.104	842.823	154.158	349.206	418.389	189.252	140.241	183.216	731.159

## Sheet: Table S5
Table S5. Expression profiles of the grapevine VviYABs during berry developmental and ripening.
	2012-06-20			2012-06-29			2012-07-09			2012-07-18			2012-07-27			2012-08-07			2012-08-17			2012-08-28			2012-09-07			2012-09-18			2012-09-28			2012-10-09			2012-10-15
	Repeat1	Repeat2	Repeat3	Repeat1	Repeat2	Repeat3	Repeat1	Repeat2	Repeat3	Repeat1	Repeat2	Repeat3	Repeat1	Repeat2	Repeat3	Repeat1	Repeat2	Repeat3	Repeat1	Repeat2	Repeat3	Repeat1	Repeat2	Repeat3	Repeat1	Repeat2	Repeat3	Repeat1	Repeat2	Repeat3	Repeat1	Repeat2	Repeat3	Repeat1	Repeat2	Repeat3	Repeat1	Repeat2	Repeat3	Repeat1	Repeat2	Repeat3
VviYAB1-2012	50.5039	33.7641	27.4546	17.6279	20.3256	25.3422	16.2176	17.3976	16.669	14.5907	16.018	16.0586	4.41726	4.80886	5.04567	2.95047	2.21365	2.61807	1.33806	1.11646	0.81331	0.917201	0.781556	0.57011	0.844547	0.905609	1.2856	0.244698	0.197757	0.195904	0.301007	0.050015	0.336048	0.342677	0.102763	0	0.128686	0	0.135947
Mean	37.2409			21.0986			16.7614			15.5558			4.75726			2.59406			1.08928			0.756289			1.01192			0.212786			0.229023			0.14848			0.088211
VviYAB1-2013	19.5339	18.7341	21.7804	21.5401	21.4659	21.8217	22.8775	23.623	21.9258	9.90517	19.3817	11.6044	5.66721	3.75132	4.32086	2.4034	2.36915	3.12309	1.58622	1.49772	1.78435	0.965498	0.643278	0.81712	0.740966	0.459909	1.02605	0.741406	0.0857899	0.135974	0.219599	0.235031	0.131602	0.551729	0.215716	0.437794	0.272794	0.350573	0	0.0425686	0.313261	0.133604
Mean	20.0161			21.6092			22.8088			13.6304			4.5798			2.63188			1.62276			0.808632			0.742308			0.321057			0.195411			0.401746			0.207789			0.163145
VviYAB1-2014	10.7489	9.32424	9.25049	18.9724	19.0142	22.7538	21.6516	14.7597	17.7762	10.9744	10.2496	7.99832	3.06571	2.72941	3.04935	2.69032	2.57738	1.69187	1.78875	2.88076	1.16148	0.704365	0.548719	0.824943	0.374538	0.6072	0.769483	0.643476	0.668434	0.549131	0.66141	0.6754	0.405729	0.14213	0.171569	0.185924	0.255345	0.235398	0
Mean	9.77454			20.2468			18.0625			9.74077			2.94816			2.31986			1.94366			0.692676			0.58374			0.620347			0.580846			0.166541			0.163581
VviYAB2-2012	153.132	118.756	108.087	106.823	98.2358	93.6694	67.9218	75.4685	65.4855	51.1067	52.5542	47.5241	27.9198	28.1783	26.8859	24.6559	18.3468	22.5105	13.2643	9.52094	11.0927	5.1432	5.11174	6.43593	4.08404	4.11783	4.33372	3.75674	1.59172	3.38042	2.47954	2.63595	2.84358	0.957194	0.904808	1.13027	1.9325	1.81429	0.932272
Mean	126.658			99.5761			69.6253			50.395			27.6613			21.8377			11.2926			5.56362			4.17853			2.90963			2.65302			0.997424			1.55969
VviYAB2-2013	52.7934	60.9805	53.8193	65.7997	68.361	68.9145	55.8435	52.5129	50.7727	29.437	40.9922	34.9861	23.7465	29.0169	21.2238	13.8673	14.7392	19.4547	10.5367	10.8077	10.2931	6.83455	3.91986	5.65101	5.51014	4.44496	4.94517	4.23031	2.05754	2.04655	3.35479	1.56022	1.77519	2.27052	1.41471	1.00473	1.18465	2.11549	1.51761	1.18225	0.860609	1.08323
Mean	55.8644			67.6917			53.043			35.1384			24.6624			16.0204			10.5458			5.46847			4.96676			2.77813			2.23007			1.56332			1.60592			1.04203
VviYAB2-2014	81.0848	76.4981	72.0578	70.62	66.2947	74.9153	58.7864	53.2321	49.8712	34.5839	30.4434	29.6764	17.7272	19.5373	21.3666	14.1065	16.6818	12.7761	11.9514	15.1689	10.2555	5.93366	4.97582	5.92478	5.11505	3.95165	3.41653	3.78556	4.37904	3.34123	1.92756	2.19153	3.15419	1.89764	2.11813	2.3839	1.88583	1.04008	1.99769
Mean	76.5469			70.61			53.9632			31.5679			19.5437			14.5215			12.4586			5.61142			4.16108			3.83528			2.42443			2.13322			1.6412
VviYAB3-2012	18.2892	16.1563	15.6742	16.4	13.9398	16.0193	7.96824	10.1485	13.7509	5.73141	9.39067	6.34766	0.965519	1.10296	1.40576	0.508095	0.183437	0.401563	0.110772	0.211643	0.154434	0.0672896	0	0	0	0	0.07357	0	0	0	0	0	0	0	0	0	0	0	0
Mean	16.7066			15.453			10.6225			7.15658			1.15808			0.364365			0.15895			0.0224299			0.0245233			0			0			0			0
VviYAB3-2013	11.8395	13.8821	13.4798	15.0031	11.572	13.8361	13.3206	10.2689	9.32043	2.12766	6.81573	2.82514	2.30171	1.34382	0.346687	0.163372	0.386007	0.570661	0.12253	0.0840477	0.244104	0.034988	0.0368416	0.0351804	0	0.0454324	0	0.0527714	0	0.0420726	0	0	0	0	0	0.042618	0	0.0481731	0	0	0	0.0871243
Mean	13.0671			13.4704			10.97			3.92284			1.33074			0.373347			0.150227			0.03567			0.0151441			0.0316147			0			0.014206			0.0160577			0.0290414
VviYAB3-2014	10.4434	8.45114	8.50105	15.094	13.6744	17.5362	13.8803	9.74865	11.067	6.20135	4.27048	4.39859	0.893635	0.67188	1.22157	0.418307	0.183415	0.106474	0.145848	0.627912	0.140967	0	0	0	0	0	0	0.0334118	0	0	0	0	0.0419848	0	0	0	0.0293086	0	0
Mean	9.13186			15.4349			11.5653			4.95681			0.929028			0.236065			0.304909			0			0			0.0111373			0.0139949			0			0.00976953
VviYAB5-2012	0	0	0	0	0	0	0	0	0	0	0	0	0	0.103023	0	0	0	0	0	0	0	0	0	0	0	0	0	0	0	0	0	0	0	0	0.0553395	0.109057	0.135621	0	0
Mean	0			0			0			0			0.034341			0			0			0			0			0			0			0.0547988			0.045207
VviYAB5-2013	0	0	0.0626519	0	0	0	0	0	0.135138	0	0.13227	0	0	0	0	0	0	0.0590403	0	0	0	0	0	0	0	0	0.060791	0	0.0467099	0	0	0	0	0	0	0	0.0584409	0.0533584	0	0	0.145056	0.0481965
Mean	0.020884			0			0.045046			0.04409			0			0.0196801			0			0			0.0202637			0.01557			0			0			0.0372664			0.0644175
VviYAB5-2014	0	0	0	0.105722	0.0448226	0.0638066	0.0727994	0	0.110049	0	0	0	0	0	0	0	0	0	0	0	0	0	0	0	0.0513481	0	0.0771909	0	0	0	0	0	0	0	0	0	0.0341841	0.0499334	0
Mean	0			0.0714504			0.0609495			0			0			0			0			0			0.0428463			0			0			0			0.0280392
VviFAS-2012	93.5856	80.8429	63.814	98.9396	97.6478	94.517	65.7549	73.927	80.3829	68.4536	66.0471	68.0206	60.8898	58.0188	65.5878	51.1017	47.5973	50.8407	43.0801	42.426	43.7706	45.8138	42.8537	40.8708	39.3785	33.6004	36.9124	37.1117	40.7811	41.5112	34.3171	40.304	30.8217	40.3408	53.3583	45.8408	50.675	39.0877	56.2386
Mean	79.4142			97.0348			73.3549			67.5071			61.4988			49.8466			43.0922			43.1794			36.6304			39.8013			35.1476			46.5133			48.6671
VviFAS-2013	69.5171	72.3556	68.864	78.8294	77.8076	84.4023	68.198	67.6192	70.9727	60.292	66.7945	67.0274	49.6508	54.6112	53.8894	56.1126	56.0559	59.0854	47.9706	52.0826	48.3049	43.6268	50.11	45.7387	51.3087	49.8986	51.0231	32.415	42.3688	41.1156	37.1865	42.8809	39.7978	36.4859	34.5083	35.428	42.8669	36.49	42.6919	42.586	40.8713	43.1634
Mean	70.2456			80.3464			68.93			64.7046			52.7171			57.0846			49.4527			46.4918			50.7435			38.6331			39.9551			35.4741			40.6829			42.2069
VviFAS-2014	75.3915	84.8893	67.4163	95.6743	82.7667	101.15	71.1962	58.4126	56.9114	66.4226	59.3479	60.6426	61.8688	63.5005	64.3837	49.1476	44.6532	46.9678	47.5244	54.8493	49.7963	40.4995	39.5397	40.5885	43.5343	40.799	41.1308	38.4489	40.7291	38.2937	33.7383	40.0715	34.2417	41.447	43.7461	41.4878	32.9821	38.1961	38.0764
Mean	75.899			93.197			62.1734			62.1377			63.251			46.9229			50.7233			40.2092			41.8214			39.1572			36.0172			42.227			36.4182
VviINO-2012	0	0	0	0	0	0	0	0	0	0	0	0	0	0	0	0	0	0	0	0	0	0	0	0	0	0	0	0	0	0.125801	0	0	0	0	0	0	0	0	0
Mean	0			0			0			0			0			0			0			0			0			0.0419337			0			0			0
VviINO-2013	0	0	0	0	0	0	0	0	0	0	0	0	0	0	0	0	0	0	0	0	0	0	0	0	0	0	0	0	0	0	0	0	0	0	0	0	0	0	0	0	0	0
Mean	0			0			0			0			0			0			0			0			0			0			0			0			0			0
VviINO-2014	0	0	0	0	0	0	0	0	0	0	0	0	0	0	0	0	0	0	0	0	0	0	0	0	0	0	0	0	0	0	0	0	0	0	0	0	0	0	0
Mean	0			0			0			0			0			0			0			0			0			0			0			0			0
VviCRC-2012	0	0	0	0	0	0	0	0	0	0	0	0	0	0	0	0	0	0	0	0	0	0	0	0	0	0	0	0	0	0	0	0	0	0	0	0	0	0	0
Mean	0			0			0			0			0			0			0						0			0			0			0			0
VviCRC-2013	0	0	0	0	0	0	0	0	0	0	0	0	0	0	0	0	0	0	0	0	0	0	0	0	0	0	0	0	0	0	0	0	0	0	0	0	0	0	0	0	0	0
Mean	0			0			0			0			0			0			0						0			0			0			0			0			0
VviCRC-2014	0	0	0	0	0	0	0	0	0	0	0	0	0	0	0	0	0	0	0	0	0	0	0	0	0	0	0	0	0	0	0	0	0	0	0	0	0	0	0
Mean	0			0			0			0			0			0			0						0			0			0			0			0

## Sheet: Table S6
Table S6. Expression profiles of the VviYABs in response to GA3 and CPPU treatment.
Gene name	#Gene ID	CK	GA3	GA3+CPPU	log2(GA3/CK)	log2(GA3+CPPU/CK)	Result(GA3/CK)	Result(GA3+CPPU/CK)
VviYAB1	VIT_15s0048g00550.t01	76.2986	79.7479	147.269	0.0544094	1.12159	noDEG	up
VviYAB2	VIT_08s0032g01110.t01	195.766	318.991	266.1	0.695007	0.615698	noDEG	noDEG
VviYAB3	VIT_02s0154g00070.t01	24.0943	65.0575	56.8763	1.42364	1.412	up	up
VviFAS	VIT_06s0009g00880.t01	217.853	282.265	237.662	0.36432	0.298418	noDEG	noDEG

## Sheet: Table S7
Table S7. Expression profiles of the grapevine VviYABs in response to abiotic stress.
			GSM786303	GSM786304	GSM786305		GSM786306	GSM786307	GSM786308		GSM786309	GSM786310	GSM786311		GSM786312	GSM786313	GSM786314		GSM786315	GSM786316	GSM786317		GSM786318	GSM786319	GSM786320		GSM786321	GSM786322	GSM786323		GSM786324	GSM786325	GSM786326		GSM786327	GSM786328	GSM786329		GSM786330	GSM786331	GSM786332		GSM786333	GSM786334	GSM786335		GSM786336	GSM786337	GSM786338
Gene name	#Gene ID		time: Day 0 - stress: Control - rep1	time: Day 0 - stress: Control - rep2	time: Day 0 - stress: Control - rep3	Average	time: Day 4 - stress: Control - rep1	time: Day 4 - stress: Control - rep2	time: Day 4 - stress: Control - rep3	Average	time: Day 4 - stress: Water-Deficit - rep1	time: Day 4 - stress: Water-Deficit - rep2	time: Day 4 - stress: Water-Deficit - rep3	Average	time: Day 4 - stress: Salinity - rep1	time: Day 4 - stress: Salinity - rep2	time: Day 4 - stress: Salinity - rep3	Average	time: Day 8 - stress: Control - rep1	time: Day 8 - stress: Control - rep2	time: Day 8 - stress: Control - rep3	Average	time: Day 8 - stress: Water-Deficit - rep1	time: Day 8 - stress: Water-Deficit - rep2	time: Day 8 - stress: Water-Deficit - rep3	Average	time: Day 8 - stress: Salinity - rep1	time: Day 8 - stress: Salinity - rep2	time: Day 8 - stress: Salinity - rep3	Average	time: Day 12 - stress: Control - rep1	time: Day 12 - stress: Control - rep2	time: Day 12 - stress: Control - rep3	Average	time: Day 12 - stress: Water-Deficit - rep1	time: Day 12 - stress: Water-Deficit - rep2	time: Day 12 - stress: Water-Deficit - rep3	Average	time: Day 12 - stress: Salinity - rep1	time: Day 12 - stress: Salinity - rep2	time: Day 12 - stress: Salinity - rep3	Average	time: Day 16 - stress: Control - rep1	time: Day 16 - stress: Control - rep2	time: Day 16 - stress: Control - rep3	Average	time: Day 16 - stress: Water-Deficit - rep1	time: Day 16 - stress: Water-Deficit - rep2	time: Day 16 - stress: Water-Deficit - rep3
VviYAB1	VIT_15s0048g00550.t01	1612362_at	1649.6	1478.5	1465.1	1531.07	1014.7	1311.9	1261.2	1195.93	1113.8	1184.1	1051.4	1116.43	1215.1	1043.4	1023.7	1094.07	1326.8	1138.4	1495	1320.07	1198.2	1468.6	1229.9	1298.9	1109.1	1209.4	1026.9	1115.13	1203.7	1049.7	1128.6	1127.33	742	927.76	684.53	784.763	1019.4	1012.1	954.05	995.183	1197.6	1040.3	1352.1	1196.67	234.39	231.46	515.06
VviYAB2	VIT_08s0032g01110.t01	1618219_at	937.15	1112.6	1597.8	1215.85	848.57	1255.2	1025.8	1043.19	1366.1	1030.3	1037	1144.47	1112.7	844.77	813.26	923.577	927.66	803.3	1077.8	936.253	1051.7	1304.5	1091.3	1149.17	717.4	811.18	734.24	754.273	1140.8	884.3	911.84	978.98	990.65	875.41	934.59	933.55	1094.5	1152.4	1003.7	1083.53	762.07	659.79	1109.8	843.887	858.76	494.52	1108.4
VviYAB5	VIT_11s0016g05590.t01	1622209_at	869.47	893.81	1104.2	955.827	627.43	873.68	745.94	749.017	961.31	690.93	687.42	779.887	729.5	644.02	605.96	659.827	756.85	763.17	833.87	784.63	700.77	847.13	779.52	775.807	711.04	784.73	630.88	708.883	837.82	502.65	682.62	674.363	523.88	528.71	441.14	497.91	595.19	633.61	606.47	611.757	611.95	453.74	862.92	642.87	394.04	128.18	388.85
VviFAS	VIT_06s0009g00880.t01	1614298_at	812.2	940.47	1103.4	952.023	765.9	946.65	854.43	855.66	1134.8	915.45	837.16	962.47	901.24	764.16	674.67	780.023	708.07	695.53	863.93	755.843	766.4	858.18	784.89	803.157	678.67	655.81	627.71	654.063	848.86	648.31	668.3	721.823	635.71	624.53	604.32	621.52	777.15	752.02	810.38	779.85	741.22	606.41	921.34	756.323	934.44	256.27	640.47
[truncated: 5 more columns]

## Sheet: Table S8
Table S8. Expression profiles of the grapevine VviYABs in response to E. necator infection.
	GSM147672	GSM147678	GSM147684		GSM147673	GSM147679	GSM147685		GSM147674	GSM147680	GSM147686		GSM147675	GSM147681	GSM147687		GSM147676	GSM147682	GSM147688		GSM147677	GSM147683	GSM147689		GSM147690	GSM147696	GSM147702		GSM147691	GSM147697	GSM147703		GSM147692	GSM147698	GSM147704		GSM147693	GSM147699	GSM147705		GSM147694	GSM147700	GSM147706		GSM147695	GSM147701	GSM147707		GSM147708
Gene name	Vitis vinifera 'Cabernet sauvignon' infected w/ powdery mildew (Erysiphe necator) conidiospores 0 h post inoculation 1	Vitis vinifera 'Cabernet sauvignon' infected w/ powdery mildew (Erysiphe necator) conidiospores 0 h post inoculation 7	Vitis vinifera 'Cabernet sauvignon' infected w/ powdery mildew (Erysiphe necator) conidiospores 0 h post inoculation 13	AVERAGE	Vitis vinifera 'Cabernet sauvignon' infected w/ powdery mildew (Erysiphe necator) conidiospores 4 h post inoculation 2	Vitis vinifera 'Cabernet sauvignon' infected w/ powdery mildew (Erysiphe necator) conidiospores 4 h post inoculation 8	Vitis vinifera 'Cabernet sauvignon' infected w/ powdery mildew (Erysiphe necator) conidiospores 4 h post inoculation 14	AVERAGE	Vitis vinifera 'Cabernet sauvignon' infected w/ powdery mildew (Erysiphe necator) conidiospores 8 h post inoculation 3	Vitis vinifera 'Cabernet sauvignon' infected w/ powdery mildew (Erysiphe necator) conidiospores 8 h post inoculation 9	Vitis vinifera 'Cabernet sauvignon' infected w/ powdery mildew (Erysiphe necator) conidiospores 8 h post inoculation 15	AVERAGE	Vitis vinifera 'Cabernet sauvignon' infected w/ powdery mildew (Erysiphe necator) conidiospores 12 h post inoculation 4	Vitis vinifera 'Cabernet sauvignon' infected w/ powdery mildew (Erysiphe necator) conidiospores 12 h post inoculation 10	Vitis vinifera 'Cabernet sauvignon' infected w/ powdery mildew (Erysiphe necator) conidiospores 12 h post inoculation 16	AVERAGE	Vitis vinifera 'Cabernet sauvignon' infected w/ powdery mildew (Erysiphe necator) conidiospores 24 h post inoculation 5	Vitis vinifera 'Cabernet sauvignon' infected w/ powdery mildew (Erysiphe necator) conidiospores 24 h post inoculation 11	Vitis vinifera 'Cabernet sauvignon' infected w/ powdery mildew (Erysiphe necator) conidiospores 24 h post inoculation 17	AVERAGE	Vitis vinifera 'Cabernet sauvignon' infected w/ powdery mildew (Erysiphe necator) conidiospores 48 h post inoculation 6	Vitis vinifera 'Cabernet sauvignon' infected w/ powdery mildew (Erysiphe necator) conidiospores 48 h post inoculation 12	Vitis vinifera 'Cabernet sauvignon' infected w/ powdery mildew (Erysiphe necator) conidiospores 48 h post inoculation 18	AVERAGE	Vitis vinifera 'Cabernet sauvignon' mock inoculated at 0 h post inoculation 19	Vitis vinifera 'Cabernet sauvignon' mock inoculated at 0 h post inoculation 25	Vitis vinifera 'Cabernet sauvignon' mock inoculated at 0 h post inoculation 31	AVERAGE	Vitis vinifera 'Cabernet sauvignon' mock inoculated at 4 h post inoculation 20	Vitis vinifera 'Cabernet sauvignon' mock inoculateds at 4 h post inoculation 26	Vitis vinifera 'Cabernet sauvignon' mock inoculated at 4 h post inoculation 32	AVERAGE	Vitis vinifera 'Cabernet sauvignon' mock inoculated at 8 h post inoculation 21	Vitis vinifera 'Cabernet sauvignon' mock inoculated at 8 h post inoculation 27	Vitis vinifera 'Cabernet sauvignon' mock inoculated at 8 h post inoculation 33	AVERAGE	Vitis vinifera 'Cabernet sauvignon' mock inoculated at 12 h post inoculation 22	Vitis vinifera 'Cabernet sauvignon' mock inoculated at 12 h post inoculation 28	Vitis vinifera 'Cabernet sauvignon' mock inoculated at 12 h post inoculation 34	AVERAGE	Vitis vinifera 'Cabernet sauvignon' mock inoculated at 24 h post inoculation 23	Vitis vinifera 'Cabernet sauvignon' mock inoculated at 24 h post inoculation 29	Vitis vinifera 'Cabernet sauvignon' mock inoculated at 24 h post inoculation 35	AVERAGE	Vitis vinifera 'Cabernet sauvignon' mock inoculated at 48 h post inoculation 24	Vitis vinifera 'Cabernet sauvignon' mock inoculated at 48 h post inoculation 30	Vitis vinifera 'Cabernet sauvignon' mock inoculated at 48 h post inoculation 36	AVERAGE	Vitis aestivalis 'Norton ' infected w/ powdery mildew (Erysiphe necator) conidiospores 0 h post inoculation 37
VviYAB1	270.2	224.2	199.7	231.367	207	174.6	181.5	187.7	149.3	139.3	107.3	131.967	151.6	106.7	95.2	117.833	234.4	198.3	202.1	211.6	260.9	219.9	145.4	208.733	239.9	254.2	253.6	249.233	212.3	211	180	201.1	192.1	164.3	138.5	164.967	152.9	136.2	98.6	129.233	231.3	271.9	247.7	250.3	243.5	297.2	181.1	240.6	453.1
VviYAB2	451.6	385.8	373.2	403.533	631.4	738.2	703.3	690.967	750.8	655.5	606.1	670.8	394.4	379.1	328.5	367.333	473.7	377	347	399.233	516.4	437.1	414.9	456.133	436.6	488.7	422.1	449.133	512.8	602.3	525.5	546.867	794.3	625	580.7	666.667	659.9	505.7	428.7	531.433	450.7	427.9	412	430.2	450.2	434.1	384.6	422.967	504.2
VviYAB5	551.6	541.4	499.5	530.833	373.1	465.2	418.8	419.033	282.4	361.2	289.2	310.933	256.7	242.1	262.5	253.767	552.3	580.6	588.4	573.767	579.1	625	482.3	562.133	528	645.6	490.8	554.8	506.9	499.2	507.4	504.5	311.9	354.5	323.9	330.1	284.2	300.4	250.1	278.233	518	614.5	687.8	606.767	529.4	635.3	479.6	548.1	547.9
VviFAS	544.5	529.9	550.5	541.633	572.2	601.6	564.6	579.467	613.2	589	523.4	575.2	548.1	463	495.2	502.1	530.1	464.1	466.4	486.867	476.3	431.1	434.6	447.333	485.1	524.2	506.1	505.133	540.3	553.8	609.1	567.733	581.4	584.4	519.2	561.667	601.9	499.8	470.3	524	517.3	478.2	537	510.833	496.5	489.2	419	468.233	497.9
[truncated: 47 more columns]

## Sheet: Table S9
Table S9. Expression profiles of the grapevine VviYABs in response to Bois Noir phytoplasma.
			GSM322361	GSM322362	GSM322363		GSM322364	GSM322365	GSM322366		GSM322367	GSM322368		GSM322369	GSM322370
Gene name	#Gene ID		genotype: Chardonnay - disease type: Bois Noir infected - rep1	genotype: Chardonnay - disease type: Bois Noir infected - rep2	genotype: Chardonnay - disease type: Bois Noir infected - rep3	AVERAGE	genotype: Chardonnay - disease type: Healthy - rep1	genotype: Chardonnay - disease type: Healthy - rep2	genotype: Chardonnay - disease type: Healthy - rep3	AVERAGE	genotype: Incrocio Manzoni - disease type: Bois Noir infected - rep1	genotype: Incrocio Manzoni - disease type: Bois Noir infected - rep2	AVERAGE	genotype: Incrocio Manzoni - disease type: Healthy - rep1	genotype: Incrocio Manzoni - disease type: Healthy - rep2	AVERAGE
VviYAB1	VIT_15s0048g00550.t01	1612362_at	180.74	179.85	234.57	198.387	350.14	493.36	530.4	457.967	299.68	180.75	312.799	393.4	415.41	373.87
VviYAB2	VIT_08s0032g01110.t01	1618219_at	803.8	943.84	923.98	890.54	1334.6	1507.1	1312.6	1384.77	739.91	769.53	964.736	975.94	946.71	962.462
VviYAB5	VIT_11s0016g05590.t01	1622209_at	543.99	686.59	785.96	672.18	1013.2	2066.9	2337.5	1805.87	567.67	425.09	932.876	886.57	1793.2	1204.22
VviFAS	VIT_06s0009g00880.t01	1614298_at	588.65	672.31	777.08	679.347	822.3	1003.6	964.44	930.113	673.9	618.98	740.998	734.19	1101.1	858.763

## Sheet: Table S10
Table S10. Expression profiles of the grapevine VviYABs in response to GLRaV-3 infection.
	GSM786048	GSM786049	GSM786050		GSM786051	GSM786052	GSM786053		GSM786054	GSM786055	GSM786056	GSM786057		GSM786058	GSM786059	GSM786060	GSM786061
Gene name	pathogen infection: GLRaV-3 virus-infected - developmental stage name: Veraison - rep1	pathogen infection: GLRaV-3 virus-infected - developmental stage name: Veraison - rep2	pathogen infection: GLRaV-3 virus-infected - developmental stage name: Veraison - rep3	AVERAGE	pathogen infection: GLRaV-3 virus-infected - developmental stage name: Ripening - rep1	pathogen infection: GLRaV-3 virus-infected - developmental stage name: Ripening - rep2	pathogen infection: GLRaV-3 virus-infected - developmental stage name: Ripening - rep3	AVERAGE	pathogen infection: Virus-free - developmental stage name: Veraison - rep1	pathogen infection: Virus-free - developmental stage name: Veraison - rep2	pathogen infection: Virus-free - developmental stage name: Veraison - rep3	pathogen infection: Virus-free - developmental stage name: Veraison - rep4	AVERAGE	pathogen infection: Virus-free - developmental stage name: Ripening - rep1	pathogen infection: Virus-free - developmental stage name: Ripening - rep2	pathogen infection: Virus-free - developmental stage name: Ripening - rep3	pathogen infection: Virus-free - developmental stage name: Ripening - rep4	AVERAGE
VviYAB1	117.96	57.701	41.004	72.2217	18.306	9.4291	14.343	14.026	63.929	64.335	89.358	86.309	75.9828	18.842	11.831	24.223	14.63	17.3815
VviYAB2	382.82	476.68	379.24	412.913	102.46	152.2	156.31	136.99	468.88	421.79	450.02	538.04	469.683	84.746	64.361	66.798	75.303	72.802
VviYAB5	3.1174	0.76621	5.1801	3.02124	6.5749	8.0448	13.958	9.5259	13.507	18.828	16.676	2.7788	12.9474	2.346	11.448	12.11	11.264	9.292
VviFAS	1352.9	1248.4	1270.5	1290.6	1020.3	946.46	959.8	975.52	1422	1309.4	1238.1	1443.5	1353.25	972.97	997.12	998.7	1012.1	995.222

[truncated: 1 more sheets: Table S11]
